# Supplementary material
Source: PubMed Central journal article supplement (PMC6305253)
Supplement: JZUSB19-0895-ESM.pdf [file JZUSB19-0895-ESM.pdf]

## Comparative transcriptomic analysis reveals adriamycin-induced apoptosis via p53 signaling pathway in retinal pigment epithelial cells

Yu-chen LIN<sup>1,2</sup>, Ze-ren SHEN<sup>1,2</sup>, Xiao-hui SONG<sup>1,2</sup>, Xin LIU<sup>1,2</sup>, Ke YAO<sup>†1,2</sup>

<sup>1</sup>Eye Center, the Second Affiliated Hospital, Zhejiang University School of Medicine, Hangzhou 310009, China

<sup>2</sup>Key Laboratory of Ophthalmology of Zhejiang Province, Hangzhou 310009, China

<sup>†</sup>E-mail: xlren@zju.edu.cn

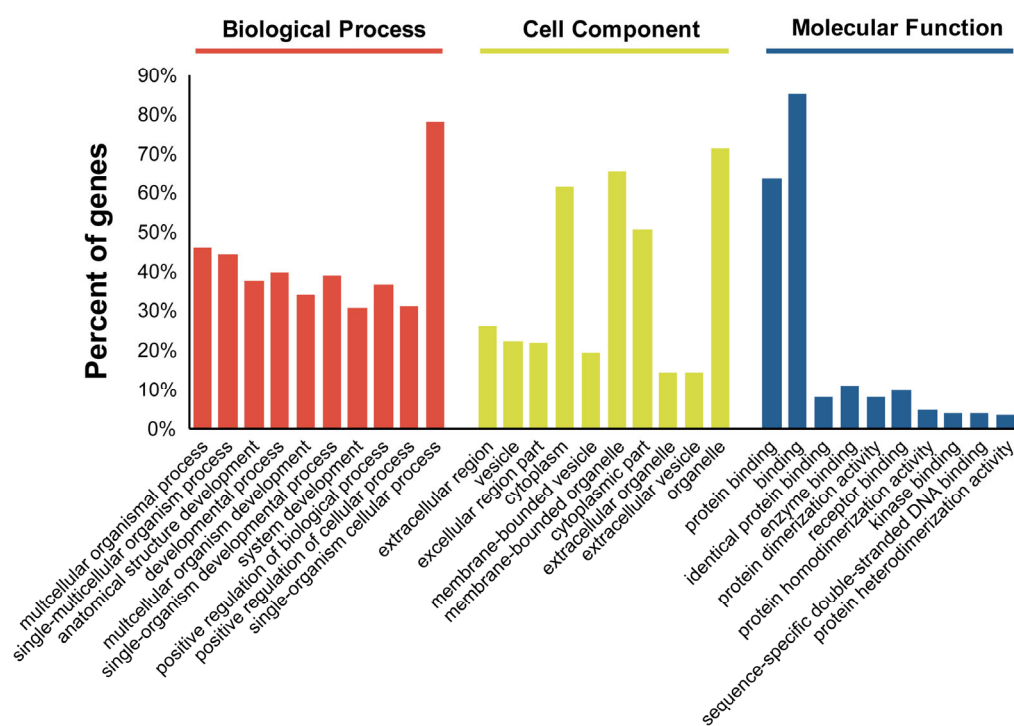

Figure.S1

Fig. S1 Gene ontology (GO) enrichment analysis of all the differentially expressed genes
